# Supplementary material for: Synaptic vesicle endocytosis deficits underlie GBA-linked cognitive dysfunction in Parkinson’s disease and Dementia with Lewy bodies
Source: PubMed Central journal article supplement (PMC11703330; doi:10.21203/rs.3.rs-5649173/v1), 2024-12-27
Supplement: NIHPPRS5649173V1-supplement-1.pdf [file NIHPPRS5649173V1-supplement-1.pdf]

## Supplementary Files

This is a list of supplementary files associated with this preprint. Click to download.

- [SupplTable1DEGlistGbavsWTVidyadharaetal.2024.xlsx](#)
- [SupplTable2DEGlistGbaSNCAvsWTVidyadharaetal.2024.xlsx](#)
- [SupplTable3DEGlistSNCAvsWTVidyadharaetal.2024.xlsx](#)
- [SupplTable4DEGsdrivingGOpathwaysVidyadharaetal.2024.xlsx](#)
- [SupplementalinformationVidyadharaetal.2024.pdf](#)
