# Supplementary material for: Synaptic vesicle endocytosis deficits underlie GBA-linked cognitive dysfunction in Parkinson’s disease and Dementia with Lewy bodies
Source: Research Square preprint supplement (doi:10.21203/rs.3.rs-5649173/v1), 2024-12-26
Supplement: Supplementary file 1 [file 432638f3b6b4133eb24edf49.pdf]

**Supplemental information:**

**Synaptic vesicle endocytosis deficits underlie GBA-linked cognitive dysfunction in Parkinson's disease and Dementia with Lewy bodies**

DJ Vidyadhara<sup>§,1,2,3,4</sup>, David Bäckström<sup>§,1,2,5</sup>, Risha Chakraborty<sup>1,2</sup>, Jae-Min Park<sup>1,2,6</sup>, Jiapeng Ruan<sup>3</sup>, Pramod K. Mistry<sup>7</sup>, Sreeganga. S. Chandra<sup>1,2,8\*</sup>

<sup>1</sup>Departments of Neurology and <sup>2</sup>Neuroscience, Yale University, CT, USA,

<sup>3</sup>Discipline of Neuroscience and <sup>4</sup>Center for Neurodegenerative Disease and Therapeutics, Chicago Medical School, Rosalind Franklin University of Medicine and Science, North Chicago, IL, USA

<sup>5</sup>Department of Clinical Science, Neurosciences, Umeå University, Sweden

<sup>6</sup>Van Andel Institute, MI, USA

<sup>7</sup>Department of Internal Medicine, Yale University, CT, USA

<sup>8</sup>Program in Cellular Neuroscience, Neurodegeneration and Repair, Yale University, CT, USA

\* Corresponding Author

\*Contact Information: [sreeganga.chandra@yale.edu](mailto:sreeganga.chandra@yale.edu); Ph: +1-203-785-6172

<sup>§</sup>Contributed equally

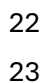

24  
25  
26  
27  
28  
29  
30  
31  
32  
33  
34  
35  
36

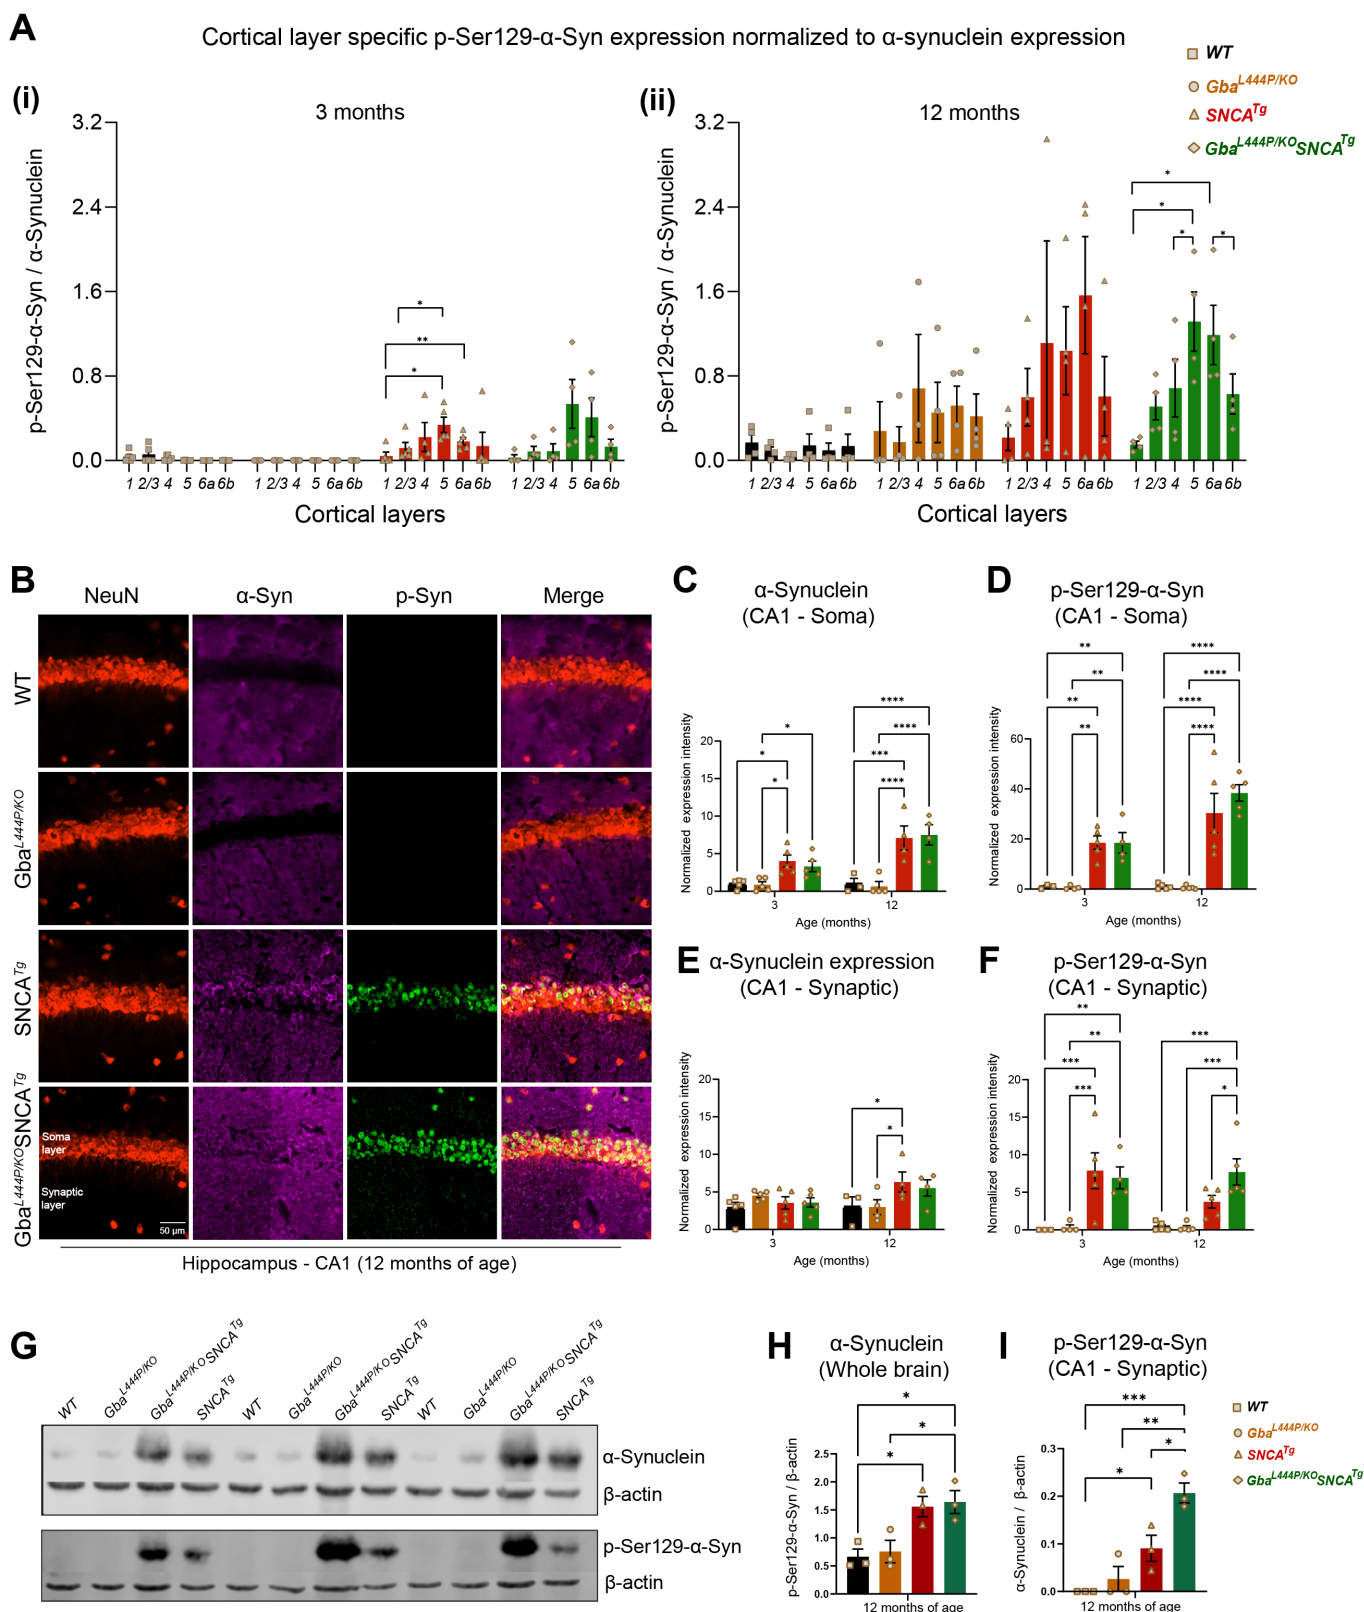

**Supplementary Figure 2.  $\alpha$ -Synuclein and pSer129- $\alpha$ -syn expression in cortex, hippocampus, and whole brain.** **A.** Cortical layer specific pSer129- $\alpha$ -syn expression normalized to  $\alpha$ -synuclein expression at the respective ages of (i) 3 and (ii) 12 months. **B.** Representative images showing  $\alpha$ -synuclein and pSer129- $\alpha$ -syn expression in

the CA1 subregion of the hippocampus in 12 month old mice. Scale = 50  $\mu$ m. **C.** Quantification of  $\alpha$ -synuclein expression in the soma layer of CA1 hippocampus. **D.** Quantification of pSer129- $\alpha$ -syn expression in the soma layer of CA1 hippocampus. **E.** Quantification of  $\alpha$ -synuclein expression in the synaptic layers of CA1 hippocampus. **F.** Quantification of pSer129- $\alpha$ -syn expression in the synaptic layers of CA1 hippocampus. **G.** Western blot showing  $\alpha$ -synuclein and pSer129- $\alpha$ -syn expression in the whole-brain homogenates of WT, Gba mutant, SNCA tg, and Gba-SNCA tg mice at 12 months of age. **H.** Quantification of western blots for  $\alpha$ -synuclein levels in whole brain. **I.** Quantifications of western blots for pSer129- $\alpha$ -syn levels in the whole brain. n = 3 -6 mice, equal number of males and females were used. Data are presented as mean  $\pm$  SEM. \*p < 0.05, \*\*p < 0.01, \*\*\*p < 0.001, and \*\*\*\*p < 0.0001.

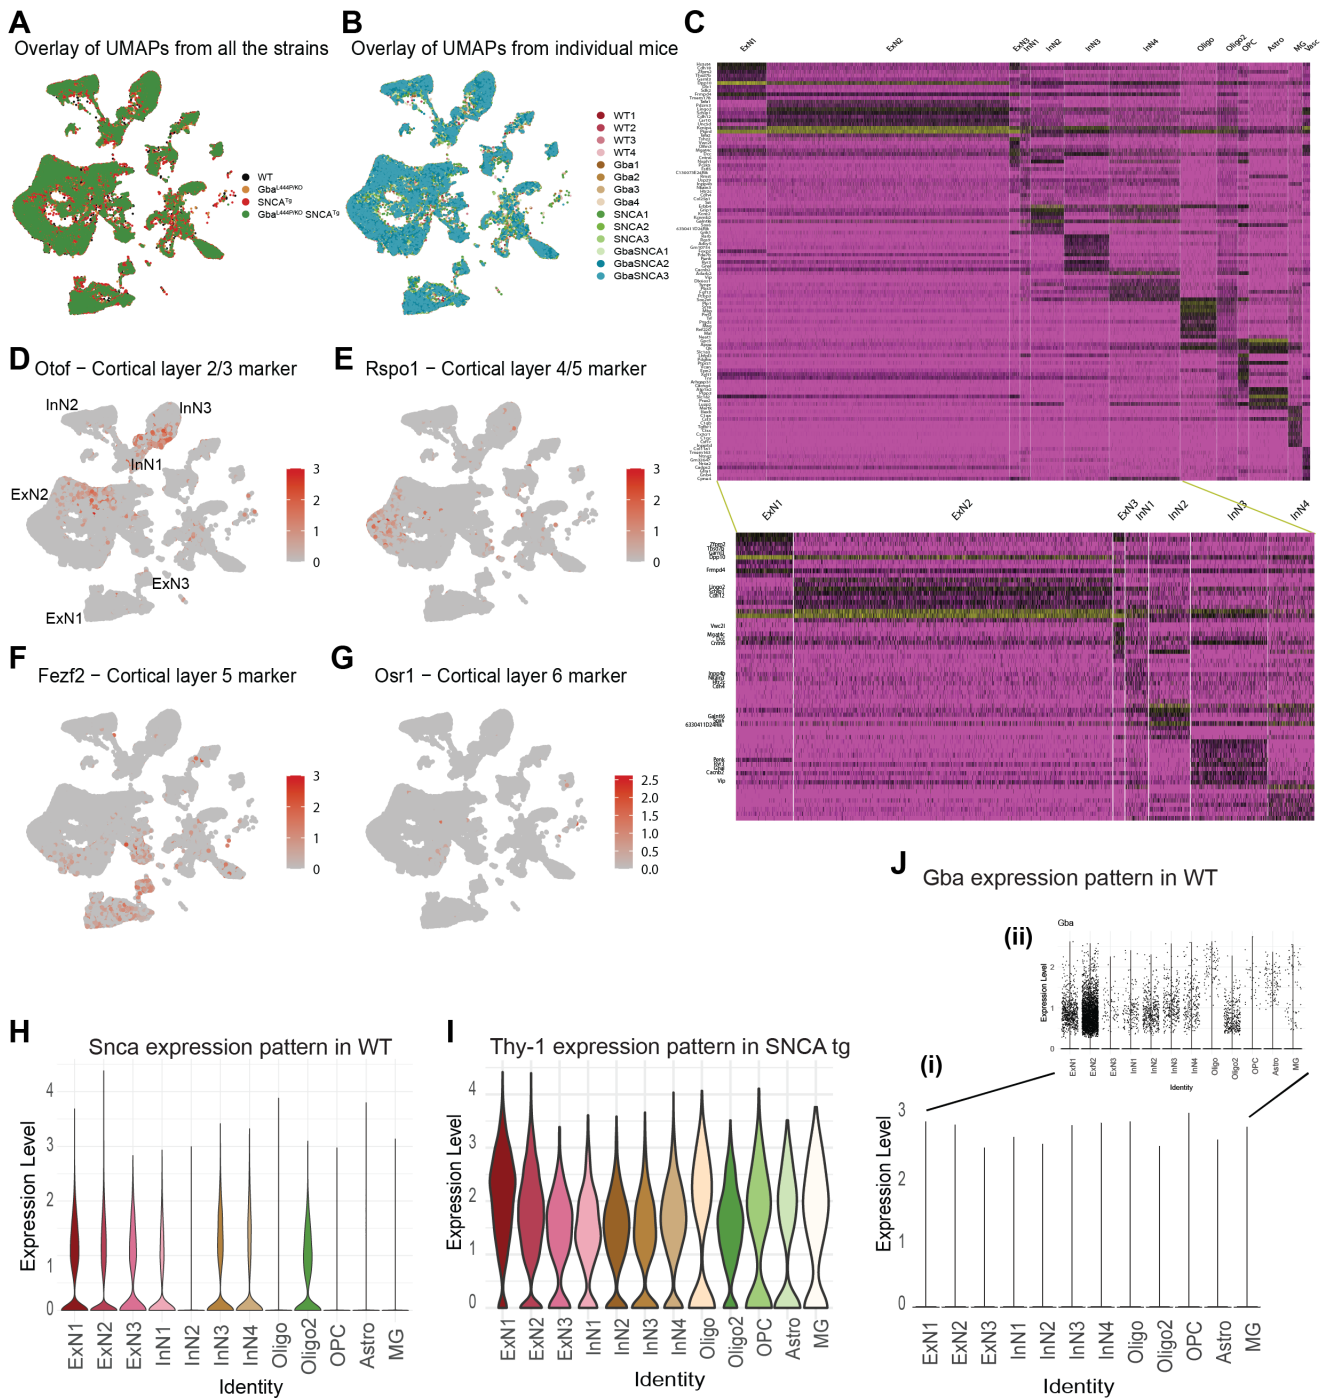

**Supplementary Figure 3. UMAPs and expression of marker genes.** **A.** Overlay of UMAPs for WT, Gba, SNCA tg, and Gba-SNCA showing lack of large-scale differences due to genotype. **B.** UMAPs for individual WT, Gba, SNCA tg, Gba-SNCA cortical samples. **C.** Cell type markers for the major clusters. **D.** Cortical layer specific markers overlaid over UMAPs. Note, that Fezf2, the marker for Layer 5 neurons, labels ExN1 neuronal subcluster. **H.** Violin plots for expression of Snca in WT for denoted cell types. **I.** Violin plots for expression of Thy-1 in SNCA tg for denoted cell types. **J.** Violin (i) and dot (ii) plots for expression of Gba in WT for denoted cell types.

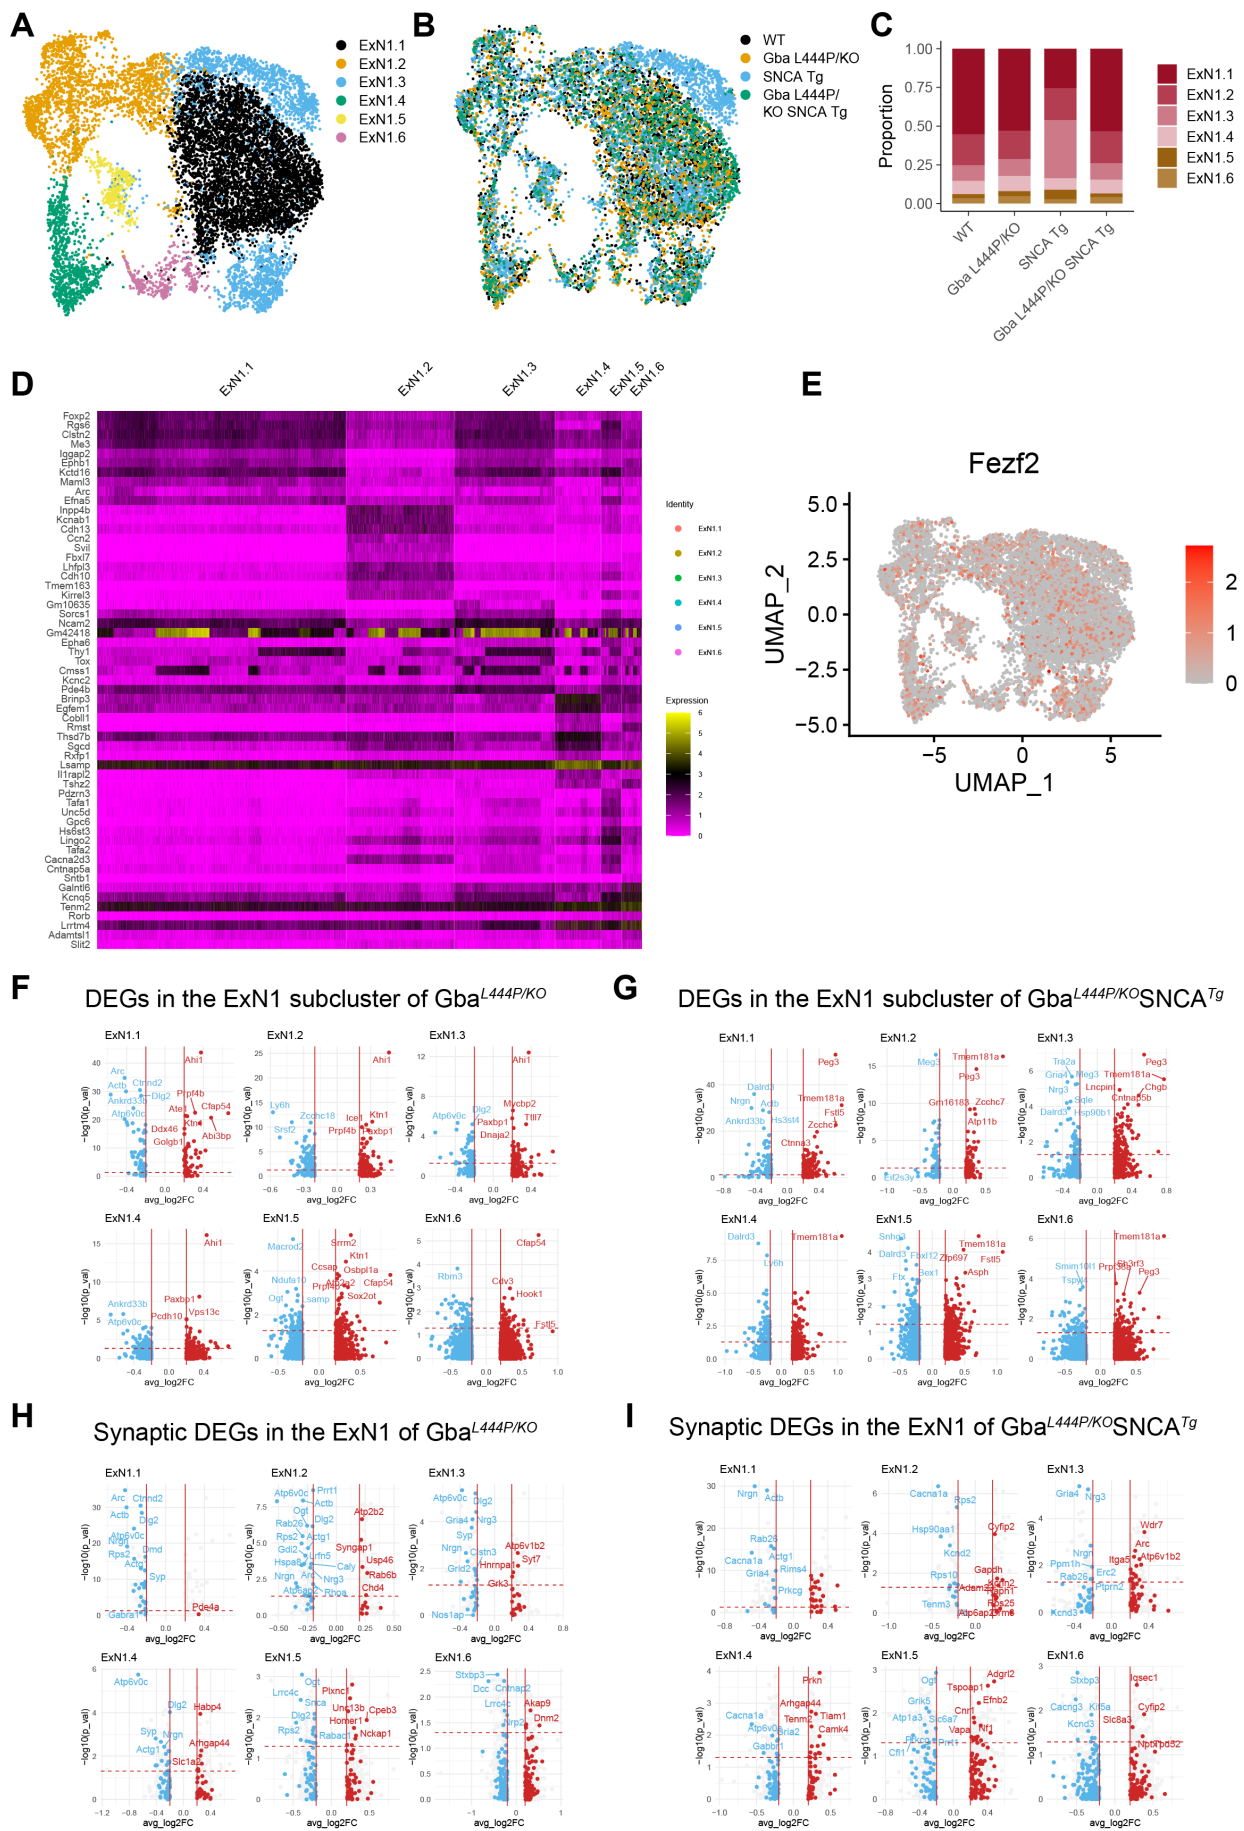

**Supplementary Figure 4: Cortical transcriptomic signatures of ExN1.** **A.** UMAP showing the six subclusters found in ExN1. **B.** Overlay of the six subclusters of ExN1 in WT, Gba, SNCA tg, and Gba-SNCA samples. **C.** Proportion of cells in each ExN subcluster in the four genotypes. **D.** Heatmap showing characteristic cell type marker expression in the subclusters of ExN1. Note that high Arc expression is a characterizing marker trait of the largest subcluster ExN1.1. **E.** UMAP showing layer 5 marker Fezf2 expression pattern across ExN1 subclusters. **F.** DEGs found in the subclusters of ExN1 in Gba mice. **G.** DEGs found in the subclusters of ExN1 in Gba-SNCA mice. **H.** SynGO analysis showing synapse associated DEGs in ExN1 subclusters of Gba cortex. **I.** SynGO analysis showing synapse associated DEGs in ExN1 subclusters of Gba-SNCA cortex. Note that among all DEGs in ExN1 (**F** and **G**), DEGs are evenly distributed within up and down regulated DEGs, while the synapse associated DEGs (**H** and **I**) are selectively downregulated in all Gba as well as Gba-SNCA ExN1 subclusters. The downregulated DEGs involved in synapse vesicle cycle pathways were largely the same as shown in the main analyses, covering all cortical clusters in Fig. 4A-B and E-F, but in addition shows *Rab26* to be similarly downregulated in both genotypes (in ExN1.2 and ExN1.1, respectively).

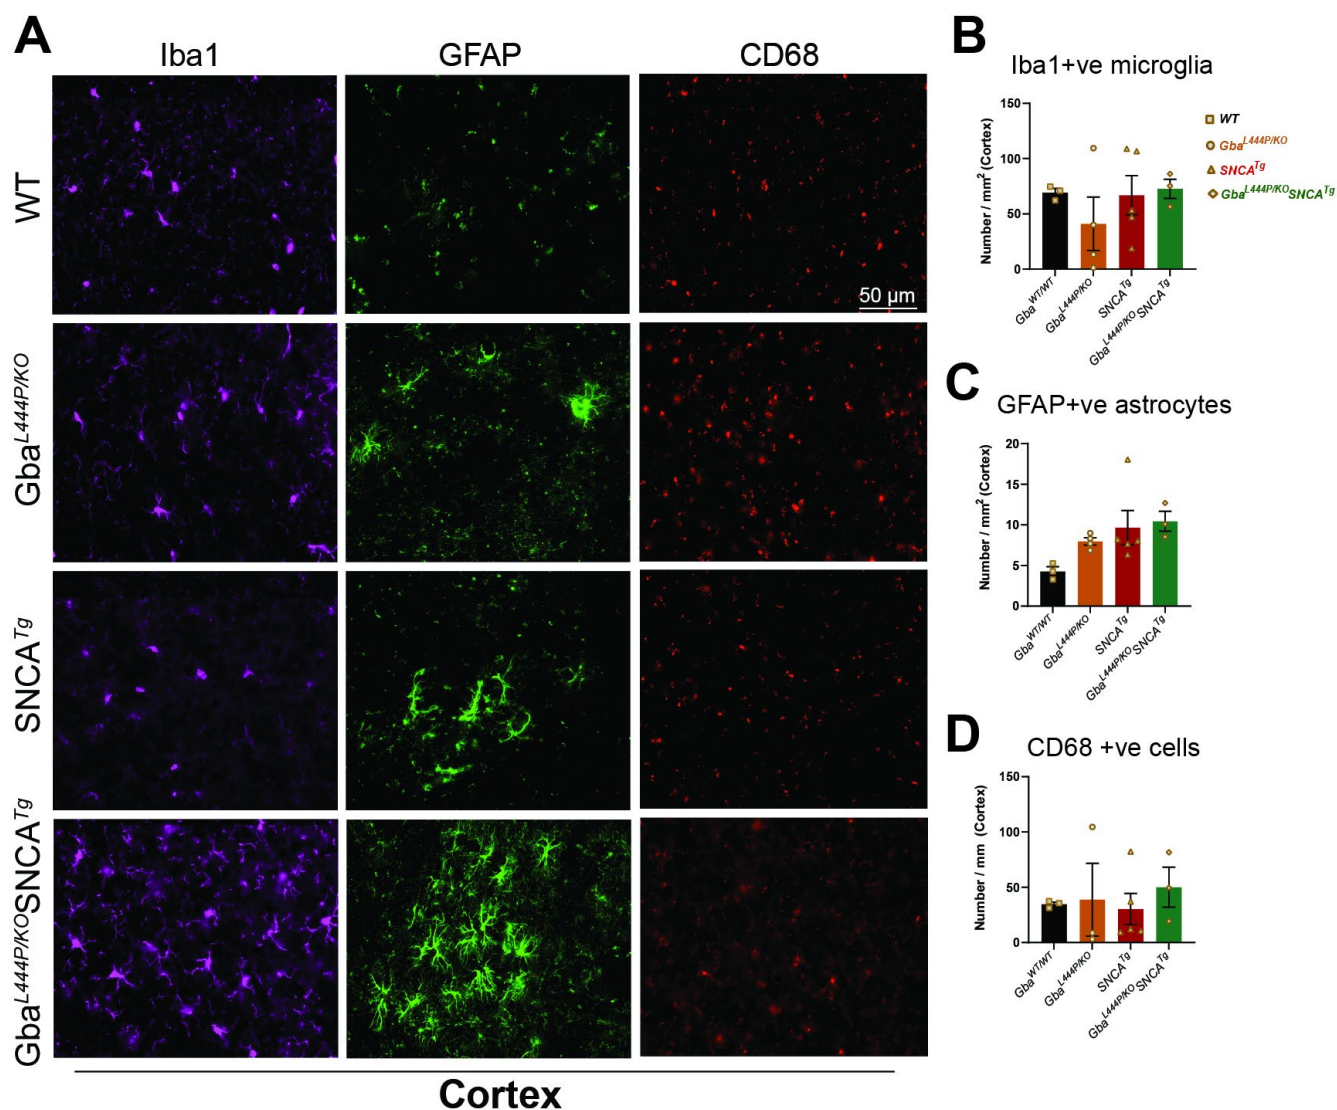

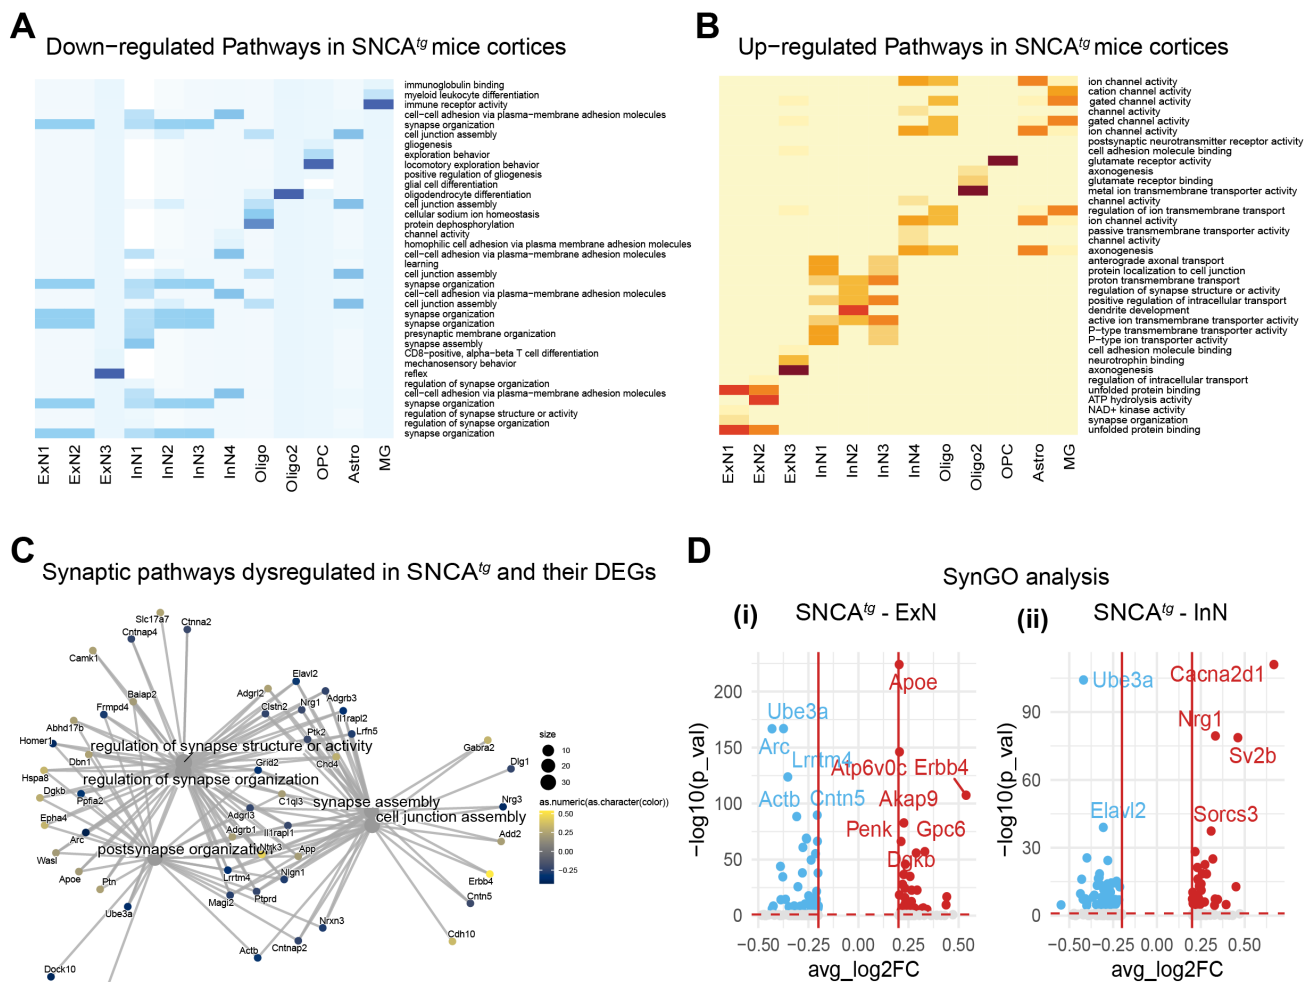

**Supplementary Figure 6. Transcriptional signatures of *SNCA<sup>tg</sup>* cortex.** **A-B**, Heatmap showing the most significant cortical gene ontology (GO) biological pathway alterations for each cell type, in 12-month old *SNCA<sup>tg</sup>* mice as revealed by unbiased analysis of enrichment of genome-wide corrected DEGs. **C**, Cnet plot for synapse pathways with associated DEGs in *SNCA<sup>tg</sup>* mice **D**, SynGO analysis of DEGs in ExN and InNs of *SNCA<sup>tg</sup>* mice.
